# Supplementary material for: Cyclosporin A as a Potential Insecticide to Control the Asian Corn Borer Ostrinia furnacalis Guenée (Lepidoptera: Pyralidae)
Source: MDPI journal article supplement (doi:10.3390/insects13100965), 2022-10-21
Supplement: s1 [file s1]

Ostrinia furnacalis : -----MSGENDRVSTTC : 12  
Helicoverpa armigera : -----MSGENDRVSTTC : 12  
Spodoptera frugiperda : -----MSGENDRVSTTC : 12  
Manduca sexta : -----MSG-NDNRVSTTC : 11  
Bombyx mori : -----MSGENDRVSTTC : 12  
Leptinotarsa decemlineata : -----MSSNNQSGTTC : 12  
Tribolium castaneum : -----MSSNNQSLSTTC : 12  
Aedes aegypti : -----MSSQFP-----NCQGNNAFTQCC-----SGGSGTGG-----N : 28  
Drosophila melanogaster : -----MSPACSNSSSSQSQSAACCCOCCNQRANVNNTHENKNAARTGTAGSGSGGAGSAGTCCQCGGTTSSGSPSPKRSITSTR : 87  
Araneus ventricosus : -----MSANSTVNSSL : 12  
Schistosoma japonicum : -----MSTNAVASNSLT : 14  
Homo sapiens : -----MSEKKAIDPFLSTTL : 15  
Oryctolagus cuniculus : -----MAAPEFAAAPEPPPEPPFPGAL : 24  
Mus musculus : -----MSEKKAIDPFLSTTL : 15  
Gallus gallus : -----MSEKKAIDPFLSTTL : 15  
Anas platyrhynchos : ----- : 15  
Aspergillus fumigatus : -----MCALARAARVCKKVPFETDILHTMEDG-----TQVSTI : 34

Ostrinia furnacalis : -----MICSVAFPHSRKIVSEVFEKTCGFLFDVLRCFPIEGREBNPAHETICQALISEKQVMEHDSPTVCGDHGCVLMLKLF : 100  
Helicoverpa armigera : -----MICSVAFPHSRKIVSEVFEKSGFLFEVLRICFPIEGREBNPAHETICQALISEKQVMEHDSPTVCGDHGCVLMLKLF : 100  
Spodoptera frugiperda : -----MICSVAFPHSRKIVSEVFEKSGFLFEVLRICFPIEGREBNPAHETICQALISEKQVMEHDSPTVCGDHGCVLMLKLF : 100  
Manduca sexta : -----MICSVAFPHSRKIVSEVFEKTCGFLFDVLRCFPIEGREBNPAHETICQALISEKQVMEHDSPTVCGDHGCVLMLKLF : 100  
Bombyx mori : -----MICSVAFPHSRKIVSEVFEKTCGFLFDVLRCFPIEGREBNPAHETICQALISEKQVMEHDSPTVCGDHGCVLMLKLF : 100  
Leptinotarsa decemlineata : -----MICAFAFPHSRKIVSEVFEKTCGFLFDVLRCFPIEGREBNPAHETICQALISEKQVMEHDSPTVCGDHGCVLMLKLF : 100  
Tribolium castaneum : -----MICAFAFPHSRKIVSEVFEKTCGFLFDVLRCFPIEGREBNPAHETICQALISEKQVMEHDSPTVCGDHGCVLMLKLF : 100  
Aedes aegypti : -----MIVLSAFPHSRKICADVEKARTCGFHDVLRCFPIEGREBNPAHETICQALISEKQVMEHDSPTVCGDHGCVLMLKLF : 117  
Drosophila melanogaster : -----MIVLSAFPHSRKICADVEKARTCGFHDVLRCFPIEGREBNPAHETICQALISEKQVMEHDSPTVCGDHGCVLMLKLF : 176  
Araneus ventricosus : -----MIVRSFPHSRKIVSEVFEKTCGFLFDVLRCFPIEGREBNPAHETICQALISEKQVMEHDSPTVCGDHGCVLMLKLF : 100  
Schistosoma japonicum : -----MIVRSFPHSRKIVSEVFEKTCGFLFDVLRCFPIEGREBNPAHETICQALISEKQVMEHDSPTVCGDHGCVLMLKLF : 101  
Homo sapiens : -----MIVRAHFPHSRKIVSEVFEKTCGFLFDVLRCFPIEGREBNPAHETICQALISEKQVMEHDSPTVCGDHGCVLMLKLF : 102  
Oryctolagus cuniculus : -----MIVRAHFPHSRKIVSEVFEKTCGFLFDVLRCFPIEGREBNPAHETICQALISEKQVMEHDSPTVCGDHGCVLMLKLF : 111  
Mus musculus : -----MIVRAHFPHSRKIVSEVFEKTCGFLFDVLRCFPIEGREBNPAHETICQALISEKQVMEHDSPTVCGDHGCVLMLKLF : 102  
Gallus gallus : -----MIVRAHFPHSRKIVSEVFEKTCGFLFDVLRCFPIEGREBNPAHETICQALISEKQVMEHDSPTVCGDHGCVLMLKLF : 102  
Anas platyrhynchos : -----MIVRAHFPHSRKIVSEVFEKTCGFLFDVLRCFPIEGREBNPAHETICQALISEKQVMEHDSPTVCGDHGCVLMLKLF : 85  
Aspergillus fumigatus : -----MIVRAHFPHSRKIVSEVFEKTCGFLFDVLRCFPIEGREBNPAHETICQALISEKQVMEHDSPTVCGDHGCVLMLKLF : 124  
E6G6 P T4YFLGCDYVDRGYSIECVIYIM IK6 yf 315LIRGNHCRHLYETTFQECRIY3E 6YGA6 aFqCPLIAA66N

Ostrinia furnacalis : -----E6G6 P T4YFLGCDYVDRGYSIECVIYIM IK6 yf 315LIRGNHCRHLYETTFQECRIY3E 6YGA6 aFqCPLIAA66N : 190  
Helicoverpa armigera : -----E6G6 P T4YFLGCDYVDRGYSIECVIYIM IK6 yf 315LIRGNHCRHLYETTFQECRIY3E 6YGA6 aFqCPLIAA66N : 190  
Spodoptera frugiperda : -----E6G6 P T4YFLGCDYVDRGYSIECVIYIM IK6 yf 315LIRGNHCRHLYETTFQECRIY3E 6YGA6 aFqCPLIAA66N : 190  
Manduca sexta : -----E6G6 P T4YFLGCDYVDRGYSIECVIYIM IK6 yf 315LIRGNHCRHLYETTFQECRIY3E 6YGA6 aFqCPLIAA66N : 189  
Bombyx mori : -----E6G6 P T4YFLGCDYVDRGYSIECVIYIM IK6 yf 315LIRGNHCRHLYETTFQECRIY3E 6YGA6 aFqCPLIAA66N : 190  
Leptinotarsa decemlineata : -----E6G6 P T4YFLGCDYVDRGYSIECVIYIM IK6 yf 315LIRGNHCRHLYETTFQECRIY3E 6YGA6 aFqCPLIAA66N : 190  
Tribolium castaneum : -----E6G6 P T4YFLGCDYVDRGYSIECVIYIM IK6 yf 315LIRGNHCRHLYETTFQECRIY3E 6YGA6 aFqCPLIAA66N : 190  
Aedes aegypti : -----E6G6 P T4YFLGCDYVDRGYSIECVIYIM IK6 yf 315LIRGNHCRHLYETTFQECRIY3E 6YGA6 aFqCPLIAA66N : 207  
Drosophila melanogaster : -----E6G6 P T4YFLGCDYVDRGYSIECVIYIM IK6 yf 315LIRGNHCRHLYETTFQECRIY3E 6YGA6 aFqCPLIAA66N : 266  
Araneus ventricosus : -----E6G6 P T4YFLGCDYVDRGYSIECVIYIM IK6 yf 315LIRGNHCRHLYETTFQECRIY3E 6YGA6 aFqCPLIAA66N : 190  
Schistosoma japonicum : -----E6G6 P T4YFLGCDYVDRGYSIECVIYIM IK6 yf 315LIRGNHCRHLYETTFQECRIY3E 6YGA6 aFqCPLIAA66N : 191  
Homo sapiens : -----E6G6 P T4YFLGCDYVDRGYSIECVIYIM IK6 yf 315LIRGNHCRHLYETTFQECRIY3E 6YGA6 aFqCPLIAA66N : 192  
Oryctolagus cuniculus : -----E6G6 P T4YFLGCDYVDRGYSIECVIYIM IK6 yf 315LIRGNHCRHLYETTFQECRIY3E 6YGA6 aFqCPLIAA66N : 201  
Mus musculus : -----E6G6 P T4YFLGCDYVDRGYSIECVIYIM IK6 yf 315LIRGNHCRHLYETTFQECRIY3E 6YGA6 aFqCPLIAA66N : 201  
Gallus gallus : -----E6G6 P T4YFLGCDYVDRGYSIECVIYIM IK6 yf 315LIRGNHCRHLYETTFQECRIY3E 6YGA6 aFqCPLIAA66N : 192  
Anas platyrhynchos : -----E6G6 P T4YFLGCDYVDRGYSIECVIYIM IK6 yf 315LIRGNHCRHLYETTFQECRIY3E 6YGA6 aFqCPLIAA66N : 175  
Aspergillus fumigatus : -----E6G6 P T4YFLGCDYVDRGYSIECVIYIM IK6 yf 315LIRGNHCRHLYETTFQECRIY3E 6YGA6 aFqCPLIAA66N : 214  
E6G6 P T4YFLGCDYVDRGYSIECVIYIM IK6 yf 315LIRGNHCRHLYETTFQECRIY3E 6YGA6 aFqCPLIAA66N

Ostrinia furnacalis : -----CFLCHGGISPEINLIDIRIDREKEFPFGCMCDILWSCPIEDFGNEFNABHSSNVVRGCSFYFYACQCFIFGNLLSIRAH : 280  
Helicoverpa armigera : -----CFLCHGGISPEINLIDIRIDREKEFPFGCMCDILWSCPIEDFGNEFNABHSSNVVRGCSFYFYACQCFIFGNLLSIRAH : 280  
Spodoptera frugiperda : -----CFLCHGGISPEINLIDIRIDREKEFPFGCMCDILWSCPIEDFGNEFNABHSSNVVRGCSFYFYACQCFIFGNLLSIRAH : 280  
Manduca sexta : -----CFLCHGGISPEINLIDIRIDREKEFPFGCMCDILWSCPIEDFGNEFNABHSSNVVRGCSFYFYACQCFIFGNLLSIRAH : 279  
Bombyx mori : -----CFLCHGGISPEINLIDIRIDREKEFPFGCMCDILWSCPIEDFGNEFNABHSSNVVRGCSFYFYACQCFIFGNLLSIRAH : 280  
Leptinotarsa decemlineata : -----CFLCHGGISPEINLIDIRIDREKEFPFGCMCDILWSCPIEDFGNEFNABHSSNVVRGCSFYFYACQCFIFGNLLSIRAH : 280  
Tribolium castaneum : -----CFLCHGGISPEINLIDIRIDREKEFPFGCMCDILWSCPIEDFGNEFNABHSSNVVRGCSFYFYACQCFIFGNLLSIRAH : 280  
Aedes aegypti : -----CFLCHGGISPEINLIDIRIDREKEFPFGCMCDILWSCPIEDFGNEFNABHSSNVVRGCSFYFYACQCFIFGNLLSIRAH : 297  
Drosophila melanogaster : -----CFLCHGGISPEINLIDIRIDREKEFPFGCMCDILWSCPIEDFGNEFNABHSSNVVRGCSFYFYACQCFIFGNLLSIRAH : 356  
Araneus ventricosus : -----CFLCHGGISPEINLIDIRIDREKEFPFGCMCDILWSCPIEDFGNEFNABHSSNVVRGCSFYFYACQCFIFGNLLSIRAH : 280  
Schistosoma japonicum : -----CFLCHGGISPEINLIDIRIDREKEFPFGCMCDILWSCPIEDFGNEFNABHSSNVVRGCSFYFYACQCFIFGNLLSIRAH : 281  
Homo sapiens : -----CFLCHGGISPEINLIDIRIDREKEFPFGCMCDILWSCPIEDFGNEFNABHSSNVVRGCSFYFYACQCFIFGNLLSIRAH : 282  
Oryctolagus cuniculus : -----CFLCHGGISPEINLIDIRIDREKEFPFGCMCDILWSCPIEDFGNEFNABHSSNVVRGCSFYFYACQCFIFGNLLSIRAH : 291  
Mus musculus : -----CFLCHGGISPEINLIDIRIDREKEFPFGCMCDILWSCPIEDFGNEFNABHSSNVVRGCSFYFYACQCFIFGNLLSIRAH : 282  
Gallus gallus : -----CFLCHGGISPEINLIDIRIDREKEFPFGCMCDILWSCPIEDFGNEFNABHSSNVVRGCSFYFYACQCFIFGNLLSIRAH : 282  
Anas platyrhynchos : -----CFLCHGGISPEINLIDIRIDREKEFPFGCMCDILWSCPIEDFGNEFNABHSSNVVRGCSFYFYACQCFIFGNLLSIRAH : 265  
Aspergillus fumigatus : -----CFLCHGGISPEINLIDIRIDREKEFPFGCMCDILWSCPIEDFGNEFNABHSSNVVRGCSFYFYACQCFIFGNLLSIRAH : 304  
CFLCHGGISPEINLIDIRIDREKEFPFGCMCDILWSCPIEDFGNEFNABHSSNVVRGCSFYFYACQCFIFGNLLSIRAH

Ostrinia furnacalis : -----ACDAGYMYRKSQTTFSSITIFSAPNVILVYNNKAA LKYENNVMNIRQFNCSEHYWLPNFMVFTWSLFPVGEKTEMVNVNINIC : 370  
Helicoverpa armigera : -----ACDAGYMYRKSQTTFSSITIFSAPNVILVYNNKAA LKYENNVMNIRQFNCSEHYWLPNFMVFTWSLFPVGEKTEMVNVNINIC : 370  
Spodoptera frugiperda : -----ACDAGYMYRKSQTTFSSITIFSAPNVILVYNNKAA LKYENNVMNIRQFNCSEHYWLPNFMVFTWSLFPVGEKTEMVNVNINIC : 370  
Manduca sexta : -----ACDAGYMYRKSQTTFSSITIFSAPNVILVYNNKAA LKYENNVMNIRQFNCSEHYWLPNFMVFTWSLFPVGEKTEMVNVNINIC : 369  
Bombyx mori : -----ACDAGYMYRKSQTTFSSITIFSAPNVILVYNNKAA LKYENNVMNIRQFNCSEHYWLPNFMVFTWSLFPVGEKTEMVNVNINIC : 370  
Leptinotarsa decemlineata : -----ACDAGYMYRKSQTTFSSITIFSAPNVILVYNNKAA LKYENNVMNIRQFNCSEHYWLPNFMVFTWSLFPVGEKTEMVNVNINIC : 370  
Tribolium castaneum : -----ACDAGYMYRKSQTTFSSITIFSAPNVILVYNNKAA LKYENNVMNIRQFNCSEHYWLPNFMVFTWSLFPVGEKTEMVNVNINIC : 370  
Aedes aegypti : -----ACDAGYMYRKSQTTFSSITIFSAPNVILVYNNKAA LKYENNVMNIRQFNCSEHYWLPNFMVFTWSLFPVGEKTEMVNVNINIC : 387  
Drosophila melanogaster : -----ACDAGYMYRKSQTTFSSITIFSAPNVILVYNNKAA LKYENNVMNIRQFNCSEHYWLPNFMVFTWSLFPVGEKTEMVNVNINIC : 446  
Araneus ventricosus : -----ACDAGYMYRKSQTTFSSITIFSAPNVILVYNNKAA LKYENNVMNIRQFNCSEHYWLPNFMVFTWSLFPVGEKTEMVNVNINIC : 370  
Schistosoma japonicum : -----ACDAGYMYRKSQTTFSSITIFSAPNVILVYNNKAA LKYENNVMNIRQFNCSEHYWLPNFMVFTWSLFPVGEKTEMVNVNINIC : 371  
Homo sapiens : -----ACDAGYMYRKSQTTFSSITIFSAPNVILVYNNKAA LKYENNVMNIRQFNCSEHYWLPNFMVFTWSLFPVGEKTEMVNVNINIC : 372  
Oryctolagus cuniculus : -----ACDAGYMYRKSQTTFSSITIFSAPNVILVYNNKAA LKYENNVMNIRQFNCSEHYWLPNFMVFTWSLFPVGEKTEMVNVNINIC : 381  
Mus musculus : -----ACDAGYMYRKSQTTFSSITIFSAPNVILVYNNKAA LKYENNVMNIRQFNCSEHYWLPNFMVFTWSLFPVGEKTEMVNVNINIC : 372  
Gallus gallus : -----ACDAGYMYRKSQTTFSSITIFSAPNVILVYNNKAA LKYENNVMNIRQFNCSEHYWLPNFMVFTWSLFPVGEKTEMVNVNINIC : 372  
Anas platyrhynchos : -----ACDAGYMYRKSQTTFSSITIFSAPNVILVYNNKAA LKYENNVMNIRQFNCSEHYWLPNFMVFTWSLFPVGEKTEMVNVNINIC : 355  
Aspergillus fumigatus : -----ACDAGYMYRKSQTTFSSITIFSAPNVILVYNNKAA LKYENNVMNIRQFNCSEHYWLPNFMVFTWSLFPVGEKTEMVNVNINIC : 394  
ACDAGYMYRKSQTTFSSITIFSAPNVILVYNNKAA LKYENNVMNIRQFNCSEHYWLPNFMVFTWSLFPVGEKTEMVNVNINIC

Ostrinia furnacalis : -----SEIEIMSGD-----ALEP-----NLRREVINKKIAIKRMHVSFLREESSEVLQKGLTTPGALHGLGGGRTSKN : 443  
Helicoverpa armigera : -----SEIEIMSGD-----ALEP-----NLRREVINKKIAIKRMHVSFLREESSEVLQKGLTTPGALHGLGGGRTSKN : 443  
Spodoptera frugiperda : -----SEIEIMSGD-----ALEP-----NLRREVINKKIAIKRMHVSFLREESSEVLQKGLTTPGALHGLGGGRTSKN : 443  
Manduca sexta : -----SEIEIMSGD-----ALEP-----NLRREVINKKIAIKRMHVSFLREESSEVLQKGLTTPGALHGLGGGRTSKN : 442  
Bombyx mori : -----SEIEIMSGD-----ALEP-----NLRREVINKKIAIKRMHVSFLREESSEVLQKGLTTPGALHGLGGGRTSKN : 443  
Leptinotarsa decemlineata : -----SEIEIMSGD-----ALEP-----NLRREVINKKIAIKRMHVSFLREESSEVLQKGLTTPGALHGLGGGRTSKN : 454  
Tribolium castaneum : -----SEIEIMSGD-----ALEP-----NLRREVINKKIAIKRMHVSFLREESSEVLQKGLTTPGALHGLGGGRTSKN : 444  
Aedes aegypti : -----SEIEIMSGD-----ALEP-----NLRREVINKKIAIKRMHVSFLREESSEVLQKGLTTPGALHGLGGGRTSKN : 460  
Drosophila melanogaster : -----SEIEIMSGD-----ALEP-----NLRREVINKKIAIKRMHVSFLREESSEVLQKGLTTPGALHGLGGGRTSKN : 522  
Araneus ventricosus : -----SEIEIMSGD-----ALEP-----NLRREVINKKIAIKRMHVSFLREESSEVLQKGLTTPGALHGLGGGRTSKN : 448  
Schistosoma japonicum : -----SEIEIMSGD-----ALEP-----NLRREVINKKIAIKRMHVSFLREESSEVLQKGLTTPGALHGLGGGRTSKN : 446  
Homo sapiens : -----SEIEIMSGD-----ALEP-----NLRREVINKKIAIKRMHVSFLREESSEVLQKGLTTPGALHGLGGGRTSKN : 446  
Oryctolagus cuniculus : -----SEIEIMSGD-----ALEP-----NLRREVINKKIAIKRMHVSFLREESSEVLQKGLTTPGALHGLGGGRTSKN : 458  
Mus musculus : -----SEIEIMSGD-----ALEP-----NLRREVINKKIAIKRMHVSFLREESSEVLQKGLTTPGALHGLGGGRTSKN : 446  
Gallus gallus : -----SEIEIMSGD-----ALEP-----NLRREVINKKIAIKRMHVSFLREESSEVLQKGLTTPGALHGLGGGRTSKN : 446  
Anas platyrhynchos : -----SEIEIMSGD-----ALEP-----NLRREVINKKIAIKRMHVSFLREESSEVLQKGLTTPGALHGLGGGRTSKN : 433  
Aspergillus fumigatus : -----SEIEIMSGD-----ALEP-----NLRREVINKKIAIKRMHVSFLREESSEVLQKGLTTPGALHGLGGGRTSKN : 479  
SgDEI e d a 44e I4NKIrAIG46a vF VLREESSEVL LKglTtG LF G LsgG 6

Ostrinia furnacalis : -----LQFSNRTTSEBAGKILAINERNPPRGGTPTACEK-----KHYVNN-----AHS----- : 495  
Helicoverpa armigera : -----LQFSNRTTSEBAGKILAINERNPPRGGTPTACEK-----KHYVNN-----AHS----- : 495  
Spodoptera frugiperda : -----LQFSNRTTSEBAGKILAINERNPPRGGTPTACEK-----KHYVNN-----AHS----- : 495  
Manduca sexta : -----LQFSNRTTSEBAGKILAINERNPPRGGTPTACEK-----KHYVNN-----AHS----- : 494  
Bombyx mori : -----LQFSNRTTSEBAGKILAINERNPPRGGTPTACEK-----KHYVNN-----AHS----- : 495  
Leptinotarsa decemlineata : -----LQFSNRTTSEBAGKILAINERNPPRGGTPTACEK-----KHYVNN-----AHS----- : 509  
Tribolium castaneum : -----LQFSNRTTSEBAGKILAINERNPPRGGTPTACEK-----KHYVNN-----AHS----- : 498  
Aedes aegypti : -----LQFSNRTTSEBAGKILAINERNPPRGGTPTACEK-----KHYVNN-----AHS----- : 509  
Drosophila melanogaster : -----LQFSNRTTSEBAGKILAINERNPPRGGTPTACEK-----KHYVNN-----AHS----- : 584  
Araneus ventricosus : -----LQFSNRTTSEBAGKILAINERNPPRGGTPTACEK-----KHYVNN-----AHS----- : 503  
Schistosoma japonicum : -----LQFSNRTTSEBAGKILAINERNPPRGGTPTACEK-----KHYVNN-----AHS----- : 528  
Homo sapiens : -----LQFSNRTTSEBAGKILAINERNPPRGGTPTACEK-----KHYVNN-----AHS----- : 511  
Oryctolagus cuniculus : -----LQFSNRTTSEBAGKILAINERNPPRGGTPTACEK-----KHYVNN-----AHS----- : 524  
Mus musculus : -----LQFSNRTTSEBAGKILAINERNPPRGGTPTACEK-----KHYVNN-----AHS----- : 511  
Gallus gallus : -----LQFSNRTTSEBAGKILAINERNPPRGGTPTACEK-----KHYVNN-----AHS----- : 510  
Anas platyrhynchos : -----LQFSNRTTSEBAGKILAINERNPPRGGTPTACEK-----KHYVNN-----AHS----- : 499  
Aspergillus fumigatus : -----LQFSNRTTSEBAGKILAINERNPPRGGTPTACEK-----KHYVNN-----AHS----- : 542  
a gfsp h ItsF A4g D NER6PPz d

Figure S1. Amino acid sequence alignment for CaNs of *O. furnacalis* and other species. The black, dark grey, light gray and colourless areas respectively indicate the 90–100%, 80–90%, 60–80% and lower than 60% similarity/identity. Specific names and GenBank IDs: *O. furnacalis*, XP\_028156950.1; *Helicoverpa armigera*, XP\_021181213.1; *Spodoptera frugiperda*, XP\_035436316.1; *Manduca sexta*, XP\_030032629.1; *Bombyx mori*, NP\_001037025.1; *Leptinotarsa decemlineata*, XP\_023017364.1; *Tribolium castaneum*, EEZ99522.2; *Aedes aegypti*, XP\_021707011.1; *Drosophila melanogaster*, NP\_001259622.1; *Araneus ventricosus*, GBL91594.1; *Schistosoma japonicum*, KAH8863363.1; *Homo sapiens*, NP\_001124163.1; *Oryctolagus cuniculus*, NP\_001076196.1; *Mus musculus*, NP\_001280551.1; *Gallus gallus*, XP\_040527134.1; *Anas platyrhynchos*, EOB04152.1; *Aspergillus fumigatus*, KAF4282405.1.

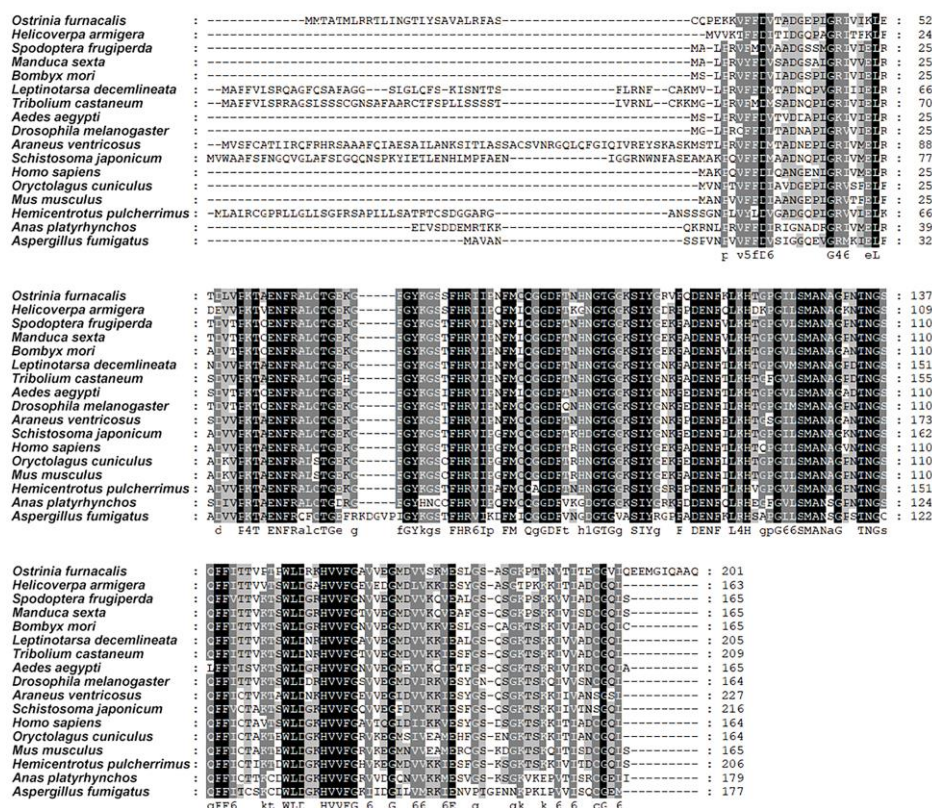

Figure S2. Amino acid sequence alignment for cyclophilins of *O. furnacalis* and other species. The similarity/identity of amino acid sequences of 90–100%, 80–90%, 60–80% and lower than 60% were respectively displayed with black, dark grey, light gray

and colourless areas. Specific names and GenBank IDs: *O. furnacalis*, XP\_028172843.1; *H. armigera*, XP\_021200657.1; *S. frugiperda*, XP\_035453679.1; *M. sexta*, XP\_030031426.1; *B. mori*, NP\_001037301.1; *L. decemlineata*, XP\_023012814.1; *T. castaneum*, EEZ98965.2; *A. aegypti*, ABF18058.1; *D. melanogaster*, NP\_523366.2; *Araneus ventricosus*, GBL90912.1; *S. japonicum*, AAA29863.1; *H. sapiens*, AAC51927.1; *O. cuniculus*, AAF22215.1; *M. Musculus*, NP\_598845.1; *Hemicentrotus pulcherrimus*, AAB37708.1; *A. platyrhynchos*, AJR16770.1; *A. fumigatus*, CAI78448.1.
